# Supplementary material
Source: MDPI journal article supplement (https://www.mdpi.com/2073-4352/11/2/140)

# Supplementary Material

## Studies on the Characteristics of Nanostructures Produced by Sparking Discharge Process in the Ambient Atmosphere for Air Filtration Application

T. Kumpika<sup>a, b</sup>, Stefan Ručman<sup>\*a, b</sup>, S. Polinc, E. Kantarak<sup>b</sup>, W. Sroila<sup>b</sup>, W. Thongsuwan<sup>b</sup>, A. Panthawan<sup>b</sup>, Panupong Sanmuangmoon<sup>d</sup>, N. Jhuntama<sup>e</sup> and Pisith. Singjai<sup>\*a, b</sup>

<sup>a</sup>Materials Science Research Center, Faculty of Science, Chiang Mai University, Chiang Mai and Thailand

<sup>b</sup>Department of Physics and Materials Science, Faculty of Science, Chiang Mai University, Chiang Mai, Thailand

<sup>c</sup>Faculty of Science and Technology, Rajamangala University of Technology Suvarnabhumi, Phranakhon Si Ayutthaya, Thailand

<sup>d</sup>Faculty of Science, Chiang Mai University, Chiang Mai 50200, Thailand

<sup>e</sup>Faculty of Science and Agricultural Technology, Rajamangala University of Technology Lanna, Chiang Mai, Thailand

\* Correspondence: authors. Tel: +66 53 941922 ext. 610, Fax: +66 53 892271  
E-mail address: pisith.s@cmu.ac.th

## Supplementary Material

Electronic Supplementary Figure 1. Chronological representation of sparking machine apparatus from first prototype to current advanced version. Figure 1a first sparking machine (2004) prototype, used to create nanoparticles seed for nanotube growth; Figure 1b Multiheaded open air sparking machine for surface modification (2009) Figure 1c 2015 static head sparking machine model in commercial production (Image source ref 1.) Figure 1d Multiheaded sparking machine for high surface areas, model for surface modification (Image source ref 1.) Figure 1e Novel advance sparking machine model, automated and suitable for controlled conditions, (2019) (Image source ref 2.).

1. Ručman, S.S.; Punyodom, W.; Jakmunee, J.; Singjai, P. Inducing Crystallinity of Metal Thin Films with Weak Magnetic Fields without Thermal Annealing. *Crystals* **2018**, *8*, 362.
2. Pooseekheaw, P.; Thongpan, W.; Panthawan, A.; Kantarak, E.; Sroila, W.; Singjai, P. Porous V<sub>2</sub>O<sub>5</sub>/TiO<sub>2</sub> Nanoheterostructure Films with Enhanced Visible-Light Photocatalytic Performance Prepared by the Sparking Method. *Molecules* **2020**, *25*, 3327

## Supplementary Material

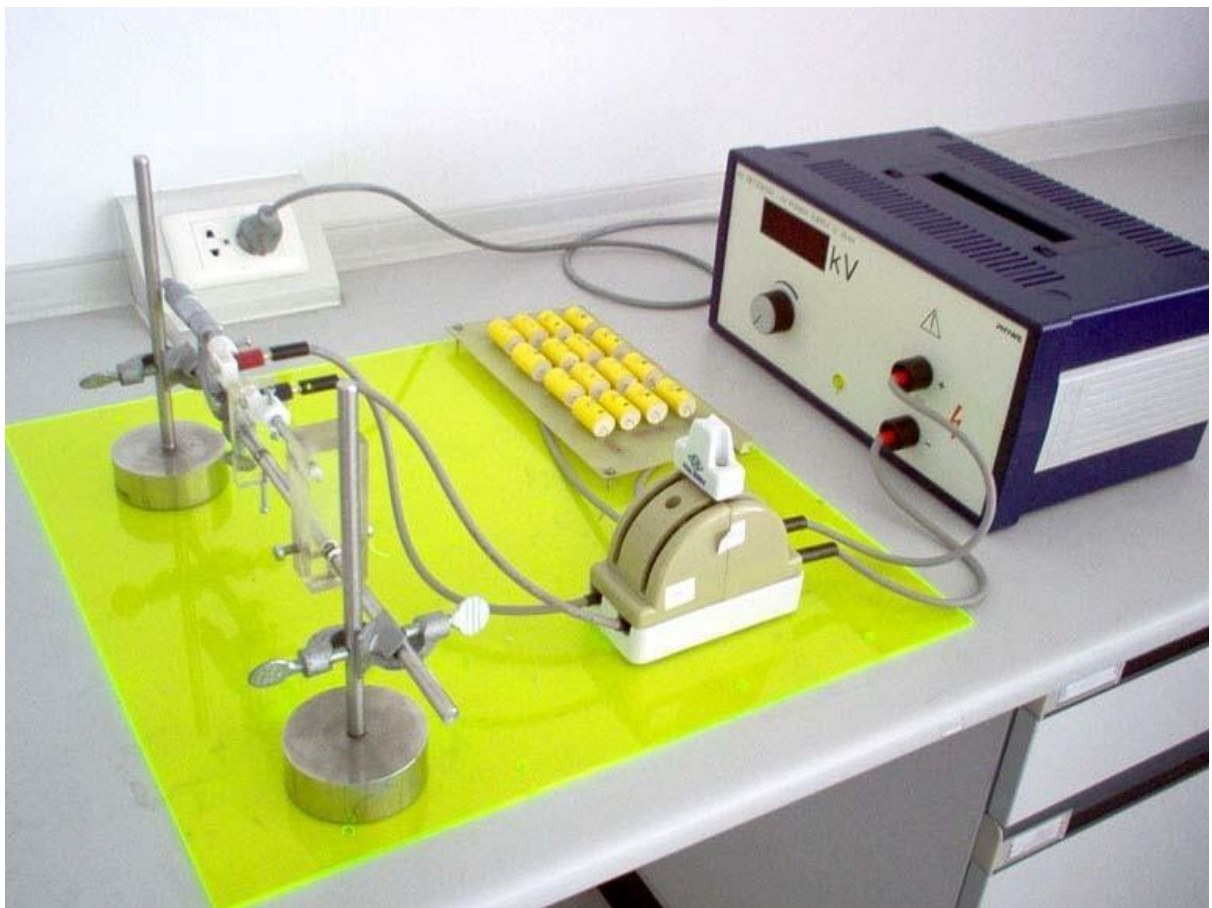

(a)

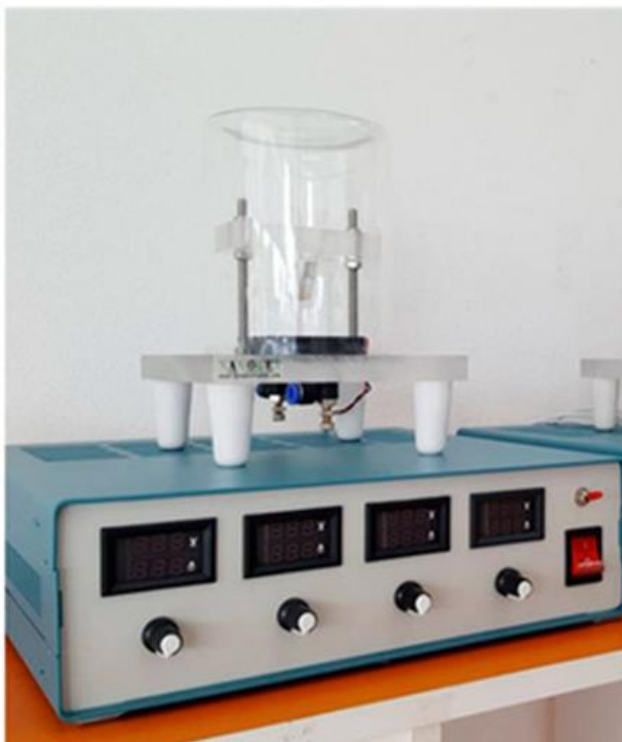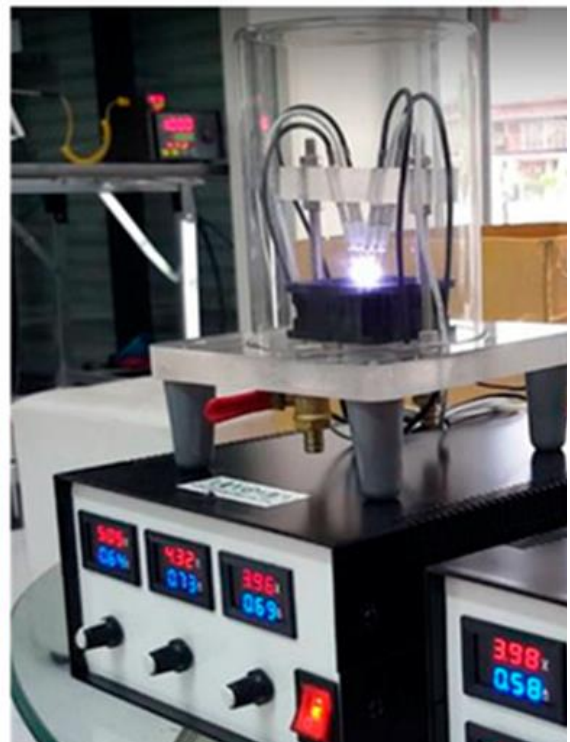

## Supplementary Material

(b)

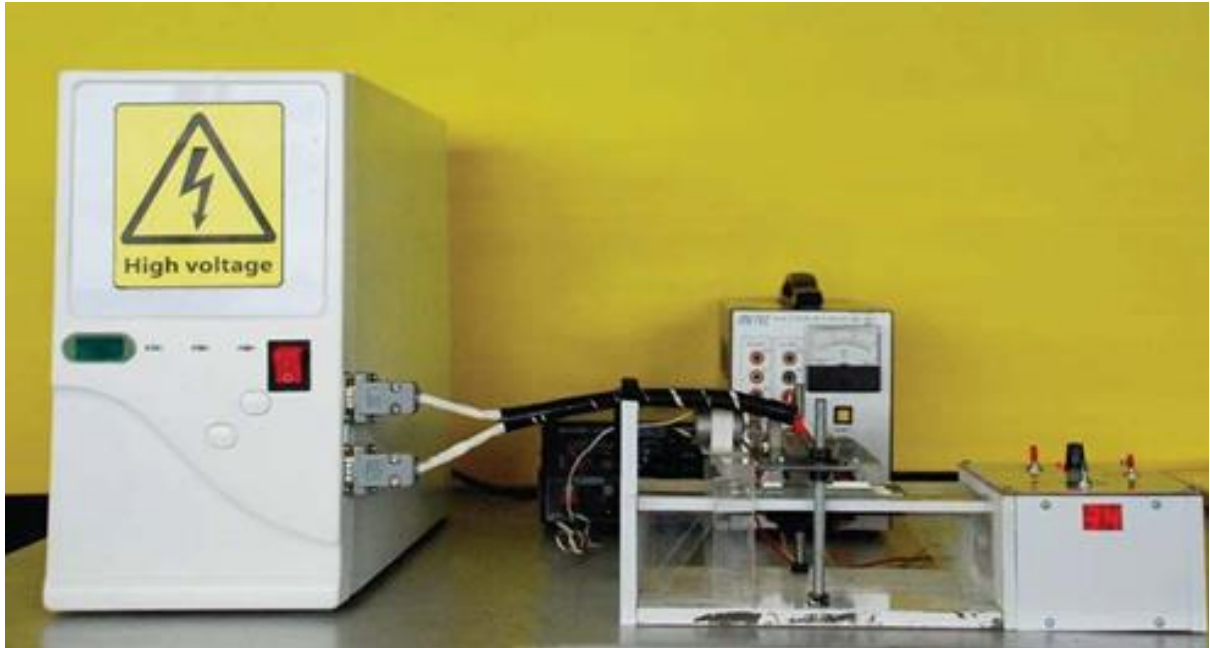

(c)

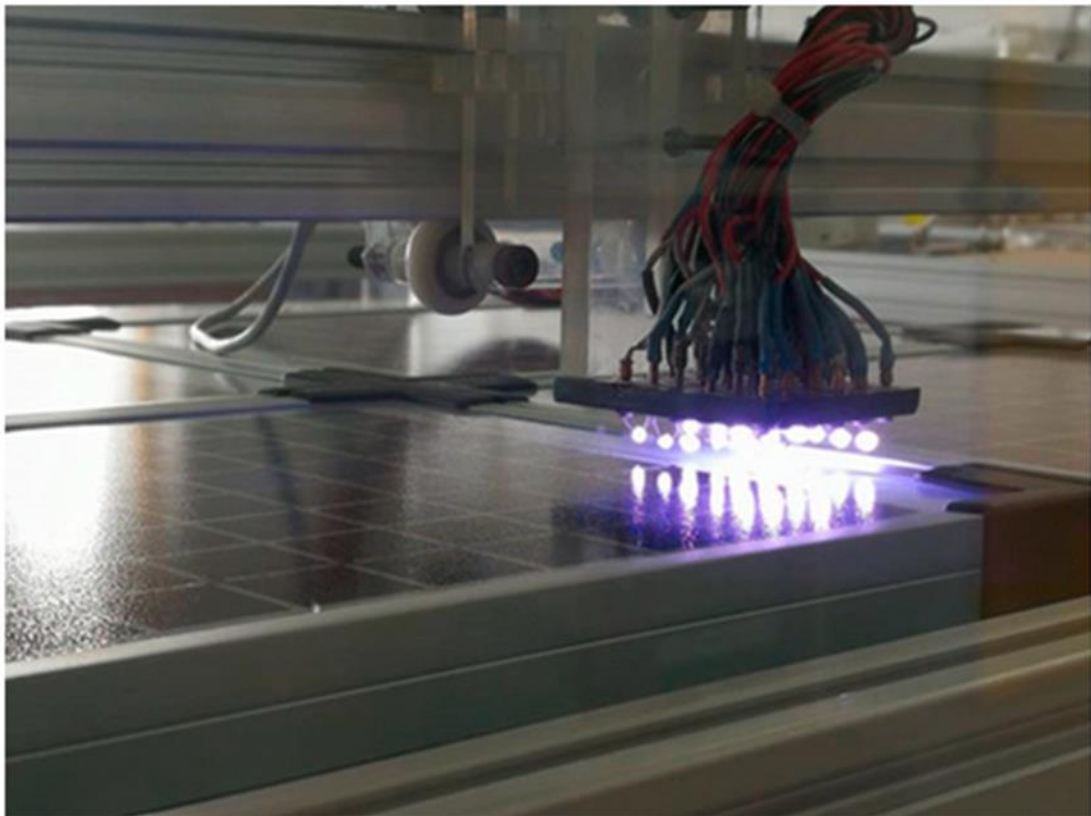

(d)

## Supplementary Material

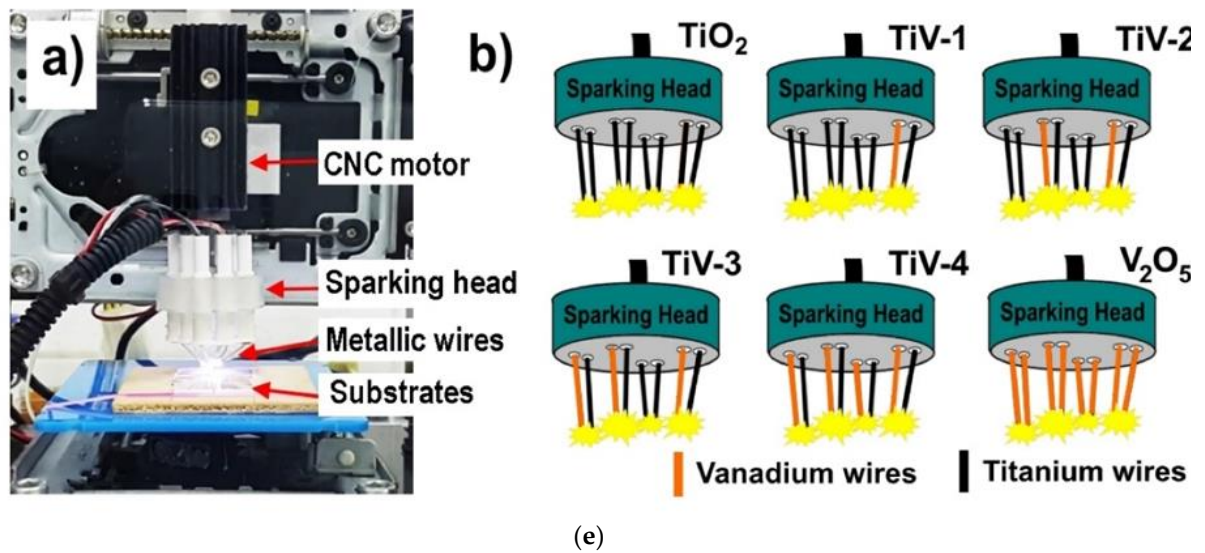

Inside of Sparking Machine, electronic components represented in this image, used in electronic circuit of sparking machine.

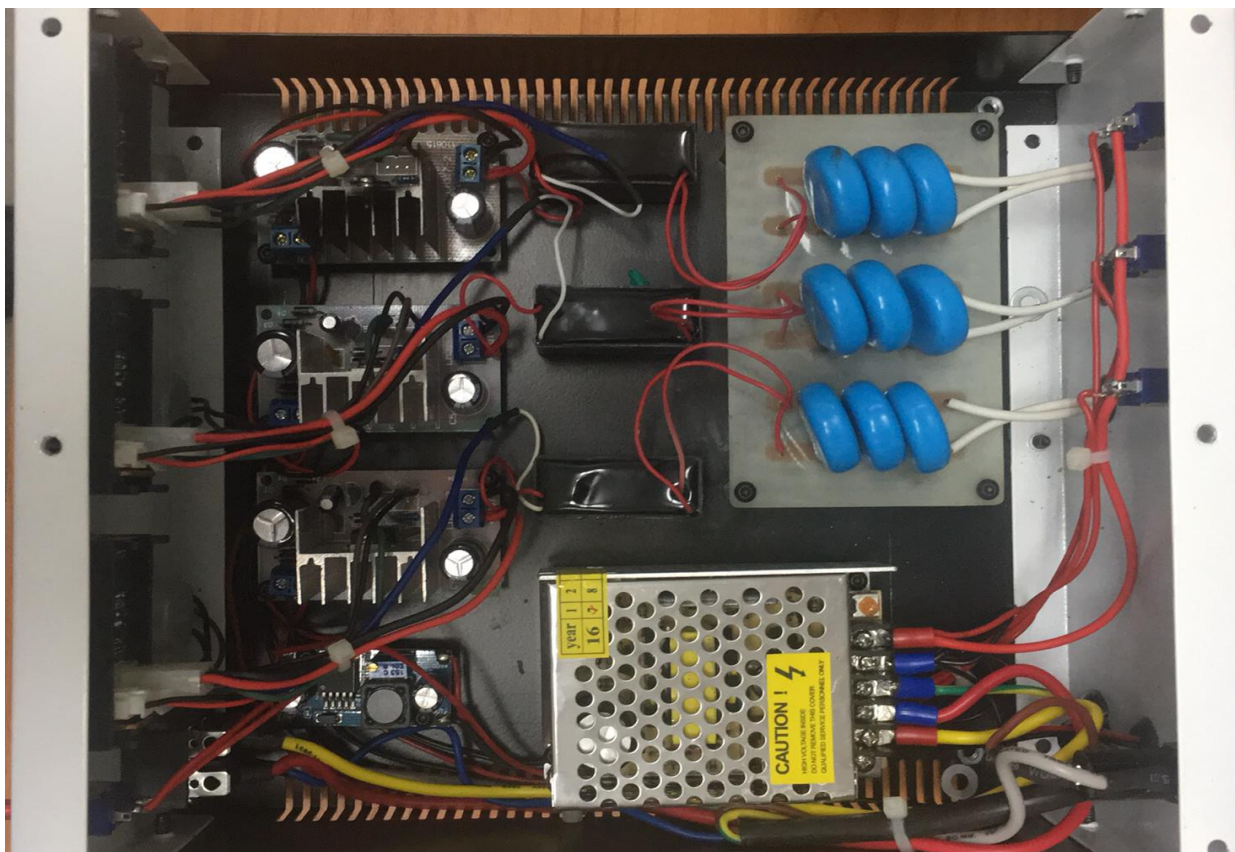

Supplement: s1 [file s1]
